# Supplementary material
Source: PubMed Central journal article supplement (PMC3302978)
Supplement: NIHMS356591-supplement-Supp_Table_S8.pdf [file NIHMS356591-supplement-Supp_Table_S8.pdf]

**Supp. Tables S1-S7** are available online as separate Supporting Information Text Files.

**Supp. Table S9** is available online as a separate Supporting Information Excel file.

**Supp. Files S1-S4** are available online as separate Supporting Information Text Files.

**Supp. Table S8. Gene Exclusion List descriptions**

| List Name                                        | Number of Genes | Construction Notes                                                                                                                                                                            |
|--------------------------------------------------|-----------------|-----------------------------------------------------------------------------------------------------------------------------------------------------------------------------------------------|
| Supp. Table S1 (empiric.txt)                     | 435             | Conservative list of genes noted to contribute potentially pathogenic <sup>a</sup> mutations to most exome projects plus <i>HLA</i> , <i>TAS</i> , <i>OR</i> and <i>MUC</i> family genes      |
| Supp. Table S2<br>(ten_in_ten_families.txt)      | 74              | empiric.txt plus genes with ten or more pathogenic mutations <sup>a,b</sup> in ten of 29 families                                                                                             |
| Supp. Table S3<br>(ten_in_twenty_families.txt)   | 36              | empiric.txt plus genes with ten or more pathogenic mutations <sup>a,b</sup> in twenty of 29 families                                                                                          |
| Supp. Table S4 (ten_in_all_families.txt)         | 14              | empiric.txt plus genes with ten or more pathogenic mutations <sup>a,b</sup> in 29 families                                                                                                    |
| Supp. Table S5 (pseudogenes.txt)                 | 1,580 (names)   | NCBI list of validated pseudogenes, including known alternate gene names                                                                                                                      |
| Supp. Table S6<br>(ten_in_more_than_3_of_27.txt) | 163             |                                                                                                                                                                                               |
| Supp. Table S7<br>(gene_exclusion_list.txt)      | 2,157           | The UDP working gene exclusion list which includes empiric.txt, pseudogenes.txt, ten_in_all_families.txt and ten_in_more_than_3_of_27.txt. Genes listed in more than one set are listed once. |

<sup>a</sup>Frame shifting, stop, nonsense, missense, canonical splice site changing genes

<sup>b</sup>CDPred predicted pathogenicity = < -1

**Supp. Table S9 Legend**

***Variants\_with\_annotations.xls* contains the combined *homozygous\_nonref\_annotations.xls*, *heterozygous\_nonref\_annotations.xls* and *heterozygous\_nonref\_annotations\_2* files in separate tabs)**

These files are derived from the varsifter file format but have been truncated to only show relevant data. For further information about this file format please go to Varsifter wiki:

<http://trek.nhgri.nih.gov/wiki/index.php/VarSifter>

The Human Gene Mutation Database (HGMD) [Stenson, et al., 2003] was also used to annotate variants found in families sequenced.

**Column headers:**

- A. **Chr:** Chromosome
- B. **LeftFlank:** The position to the left of the variant in the Hg18 genome build. For indels, the position to the left of the ambiguous bases.
- C. **RightFlank:** The position to the right of the variant in the Hg18 genome build (and indel, as above).
- D. **ref\_allele:** Reference base at this position (plus strand)
- E. **muttype:** **SNP** for single nucleotide variant or **INDEL** for insertion/deletion variant
- F. **var\_allele:** variant base at this position (plus strand)
- G. **type:** Variant type. VarSifter uses the entries in the file to create filter buttons.
- H. **Gene\_name:** The name of the gene (Refseq gene symbol).
- I. **transcript:** The UCSC ID of the displayed transcript.
- J. **strand:** The strand of the gene, or "NA".
- K. **ref\_aa:** Reference amino acid, or -
- L. **var\_aa:** Variant amino acid, or -
- M. **aa\_pos:** The position of the amino acid, or 0.
- N. **CDPred\_score:** The Conserved Domain Prediction score.
- O. **RS#:** dbSNP130, or - if none.
- P. **HGMDids:** HGMD Accession number - *Example: CM035497* (**Note: tags are added if genomic variant listed is present at the same genomic coordinate as a variant entry in HGMD, variant may or may not be the same as in HGMD**).
- Q. **HGMDdisease:** disease association as listed in HGMD.
- R. **HGMDtags:** DM disease mutation, DP disease polymorphism etc
- S. **HGMDinGene:** (Y or N) presence or absence of gene in the HGMD database.

Stenson PD, Ball EV, Mort M, Phillips AD, Shiel JA, Thomas NS, Abeyasinghe S, Krawczak M, Cooper DN. 2003. Human Gene Mutation Database (HGMD): 2003 update. *Hum Mutat* 21:577-81.
